# Supplementary material for: A Probiotic Containing L. Plantarum and P. Acidilactici Strains for Treating Upper Respiratory Infection in Children Aged 6 Months to 5 Years: A Randomized, Double-Blind Trial
Source: Research Square preprint supplement (doi:10.21203/rs.3.rs-7214019/v1), 2025-08-04
Supplement: Supplementary file 1 [file 820de388df590ab0d064227b.docx]

**A PROBIOTIC CONTAINING *L. PLANTARUM* AND *P. ACIDILACTICI* STRAINS FOR TREATING UPPER RESPIRATORY INFECTION IN CHILDREN AGED 6 MONTHS TO 5 YEARS: A RANDOMIZED, DOUBLE-BLIND TRIAL**

Andrade-Platas D1, Martinez-Figueroa MG1, Rodriguez-Palmero M2, Espadaler-Mazo J2

1 Service of Paediatrics, Hospital Medica Sur, Mexico City (Mexico).

2 R&D department, AB-Biotics SA (Kaneka Group), Barcelona (Spain).

**SUPPLEMENTARY MATERIAL**

**Supplementary Figure 1.** Study outline.

**
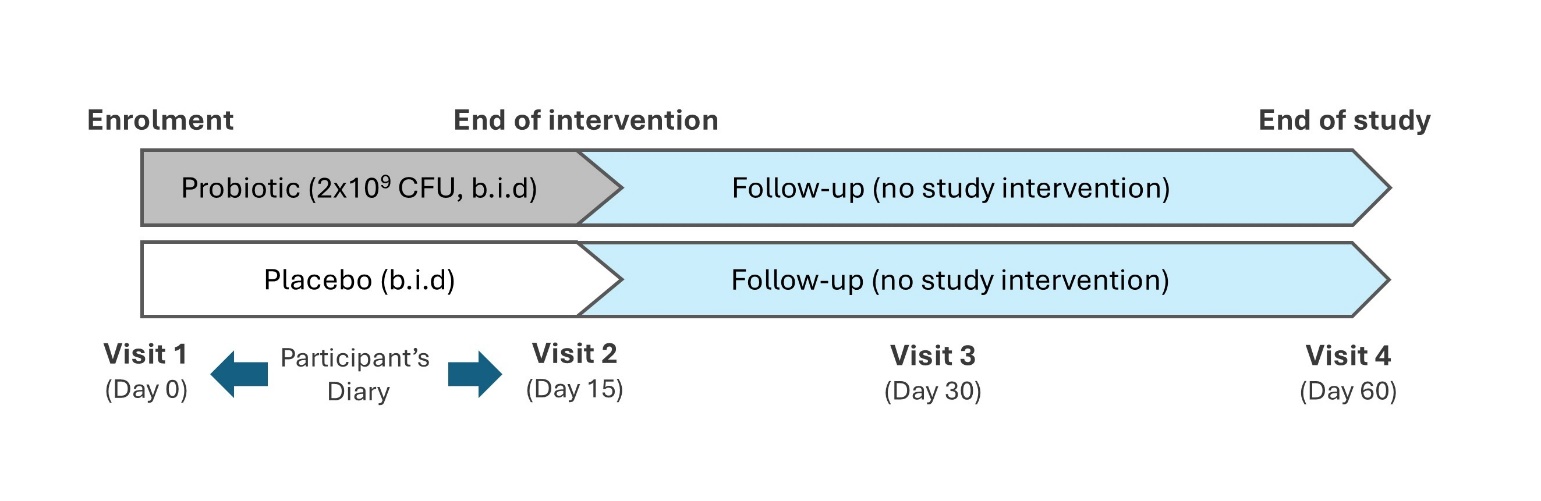
**

**Supplementary Figure 2.** Viruses detected in nasopharyngeal swabs of study participants using multiplex PCR, with number of participants positive for each virus and overall prevalence in the study population.


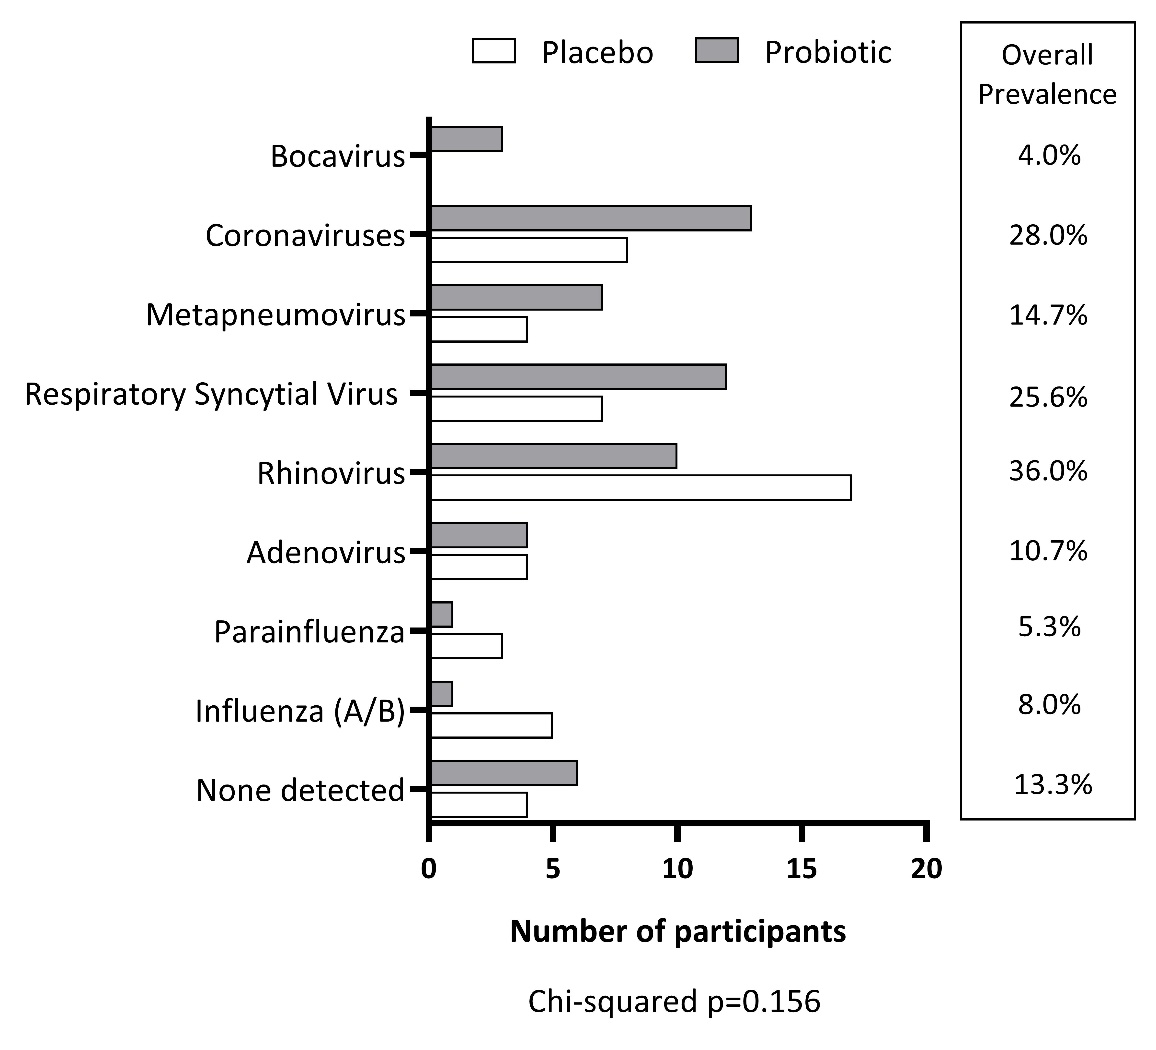


**Supplementary Table 1.** Sensitivity analyses of the primary outcomes by means of adjusted Generalized Linear Models (GLMs): days if fever (left) and days of pain/discomfort (right). Treatment and baseline factors remain significant (at p<0.01) in all models. Adjustment factors with significant effects are marked in **bold**.

a) An additional GLM model with a Coronavirus-by-treatment interaction was negative for the interaction (p=0.581).

b) An additional GLM model with a RSV-by-treatment interaction was negative for the interaction (p=0.324).

| **Days of Fever (Temperature >37.5ºC)** | | | |  | **Days of Pain/Discomfort (FLACC >3)** | | | |
| --- | --- | --- | --- | --- | --- | --- | --- | --- |
|  | Type III | | |  |  | Type III | | |
| Wald Chi2 | df | P-value |  | Wald Chi2 | df | P-value |
| **GLM adjusted for detection of Rhinovirus (y/n)** | | | |  | **GLM adjusted for detection of Rhinovirus (y/n)** | | | |
| (Intercept) | 46.878 | 1 | <0.001 |  | (Intercept) | .083 | 1 | 0.773 |
| Treatment | 11.153 | 1 | 0.001 |  | Treatment | 7.236 | 1 | 0.007 |
| Temp. (ºC) V1 | 50.652 | 1 | <0.001 |  | FLACC V1 | 49.499 | 1 | <0.001 |
| Rhinovirus | .016 | 1 | 0.901 |  | Rhinovirus | .001 | 1 | 0.972 |
| **GLM adjusted for detection of Coronaviruses (y/n)** | | | |  | **GLM adjusted for detection of Coronaviruses (y/n)** | | | |
| (Intercept) | 50.730 | 1 | <0.001 |  | (Intercept) | .140 | 1 | 0.709 |
| Treatment | 14.354 | 1 | <0.001 |  | Treatment | 8.400 | 1 | 0.004 |
| Temp. (ºC) V1 | 54.971 | 1 | <0.001 |  | FLACC V1 | 51.297 | 1 | <0.001 |
| **Coronaviruses** | 4.192 | 1 | **0.041a** |  | Coronaviruses | 1.393 | 1 | 0.238 |
| **GLM adjusted for detection of RSV (y/n)** | | | |  | **GLM adjusted for detection of RSV (y/n)** | | | |
| (Intercept) | 47.511 | 1 | <0.001 |  | (Intercept) | .123 | 1 | 0.726 |
| Treatment | 11.708 | 1 | 0.001 |  | Treatment | 10.667 | 1 | 0.001 |
| Temp. (ºC) V1 | 51.288 | 1 | <0.001 |  | FLACC V1 | 59.420 | 1 | <0.001 |
| RSV | .080 | 1 | 0.778 |  | **RSV** | 8.220 | 1 | **0.004b** |
| **GLM adjusted for age (up to 12 months *vs* older)** | | | |  | **GLM adjusted for age (up to 12 months *vs* older)** | | | |
| (Intercept) | 39.174 | 1 | <0.001 |  | (Intercept) | .535 | 1 | 0.464 |
| Treatment | 11.680 | 1 | 0.001 |  | Treatment | 7.511 | 1 | 0.006 |
| Temp. (ºC) V1 | 42.443 | 1 | <0.001 |  | FLACC V1 | 43.623 | 1 | <0.001 |
| Age | .000 | 1 | 0.991 |  | Age | 2.492 | 1 | 0.114 |
| **GLM adjusted for Sex (male/female)** | | | |  | **GLM adjusted for Sex (male/female)** | | | |
| (Intercept) | 48.222 | 1 | <0.001 |  | (Intercept) | .304 | 1 | 0.582 |
| Treatment | 10.910 | 1 | 0.001 |  | Treatment | 8.309 | 1 | 0.004 |
| Temp. (ºC) V1 | 51.961 | 1 | <0.001 |  | FLACC V1 | 44.280 | 1 | <0.001 |
| Sex | .621 | 1 | 0.431 |  | Sex | 1.229 | 1 | 0.268 |
| **GLM adjusted for number of URIs in past 2 months** | | | |  | **GLM adjusted for number of URIs in past 2 months** | | | |
| (Intercept) | 44.720 | 1 | <0.001 |  | (Intercept) | .095 | 1 | 0.758 |
| Treatment | 11.010 | 1 | 0.001 |  | Treatment | 6.958 | 1 | 0.008 |
| Temp. (ºC) V1 | 47.372 | 1 | <0.001 |  | FLACC V1 | 46.376 | 1 | <0.001 |
| URI 2 months | .023 | 1 | 0.879 |  | URI 2 months | .012 | 1 | 0.915 |

**Supplementary Table 2.** Non-parametric bivariate correlations (Spearman *rho*).

|  | | Days with  fever | Days with pain /discomfort | Days with cough | Days with rhinorrhoea | Days with congestion | Days with antipyretic | Days with antihistamine |
| --- | --- | --- | --- | --- | --- | --- | --- | --- |
| Days with  fever | *Rho* |  | *0.78* | *-0.14* | *-0.05* | *-0.17* | *0.56* | *0.01* |
| P-value |  | **<0.001** | 0.221 | 0.641 | 0.144 | **<0.001** | 0.909 |
| Days with pain /discomfort | *Rho* |  |  | *-0.12* | *-0.12* | *-0.13* | *0.72* | *-0.05* |
| P-value |  |  | 0.293 | 0.320 | 0.267 | **<0.001** | 0.652 |
| Days with  cough | *Rho* |  |  |  | *0.19* | *0.11* | *-0.14* | *0.12* |
| P-value |  |  |  | 0.109 | 0.357 | 0.244 | 0.296 |
| Days with  rhinorrhoea | *Rho* |  |  |  |  | *0.26* | *-0.18* | *0.85* |
| P-value |  |  |  |  | **0.026** | 0.129 | **<0.001** |
| Days with  congestion | *Rho* |  |  |  |  |  | *-0.10* | *0.18* |
| P-value |  |  |  |  |  | 0.382 | 0.132 |
| Days with  antipyretic | *Rho* |  |  |  |  |  |  | *-0.10* |
| P-value |  |  |  |  |  |  | 0.414 |
| Days with  antihistamine | *Rho* |  |  |  |  |  |  |  |
| P-value |  |  |  |  |  |  |  |

**Supplementary Table 3.** Adverse events (AEs) reported during the study. Digestive AEs reported herein were specifically solicited in the patient diary during the 15-day intervention phase. Other AEs could be reported during study visits 2, 3 and 4, or by phone to the study investigators.

|  | **Placebo (n=38)** | **Probiotic (n=37)** |
| --- | --- | --- |
| Solicited digestive AEs: |  |  |
| - Diarrhoea | 5 | 7 |
| - Constipation | 6 | 2 |
| - Abdominal discomfort or pain | 10 | 7 |
| - Abdominal distension | 7 | 6 |
| Other AEs | 0 | 0 |
| Severe AEs (SAEs) | 0 | 0 |
